# Supplementary material for: A pharmacogenomic method for individualized prediction of drug sensitivity
Source: PubMed Central journal article supplement — Mol Syst Biol. 2011 Jul 19;7:513. doi: 10.1038/msb.2011.47 (PMC3159972; doi:10.1038/msb.2011.47), 2011-07-19
Supplement: msb201147-s1.pdf [file msb201147-s1.pdf]

Supplementary Material

|                                                                                                     |          |
|-----------------------------------------------------------------------------------------------------|----------|
| <b>Supplemental Figure 1. Box and whisker analysis of breast cancer datasets.</b>                   | <b>2</b> |
| <b>Supplemental Figure 2. Predicted response to fulvestrant across breast cancer subtypes.</b>      | <b>3</b> |
| <b>Supplemental Figure 3. PLX4032 Signature and Validation.</b>                                     | <b>4</b> |
| <b>Supplemental Figure 4. In vivo response to VPA and doxorubicin in a VPA-sensitive xenograft.</b> | <b>5</b> |
| <b>Supplemental Table 1. Subtype breakdown for the eleven independent breast cancer datasets.</b>   | <b>6</b> |

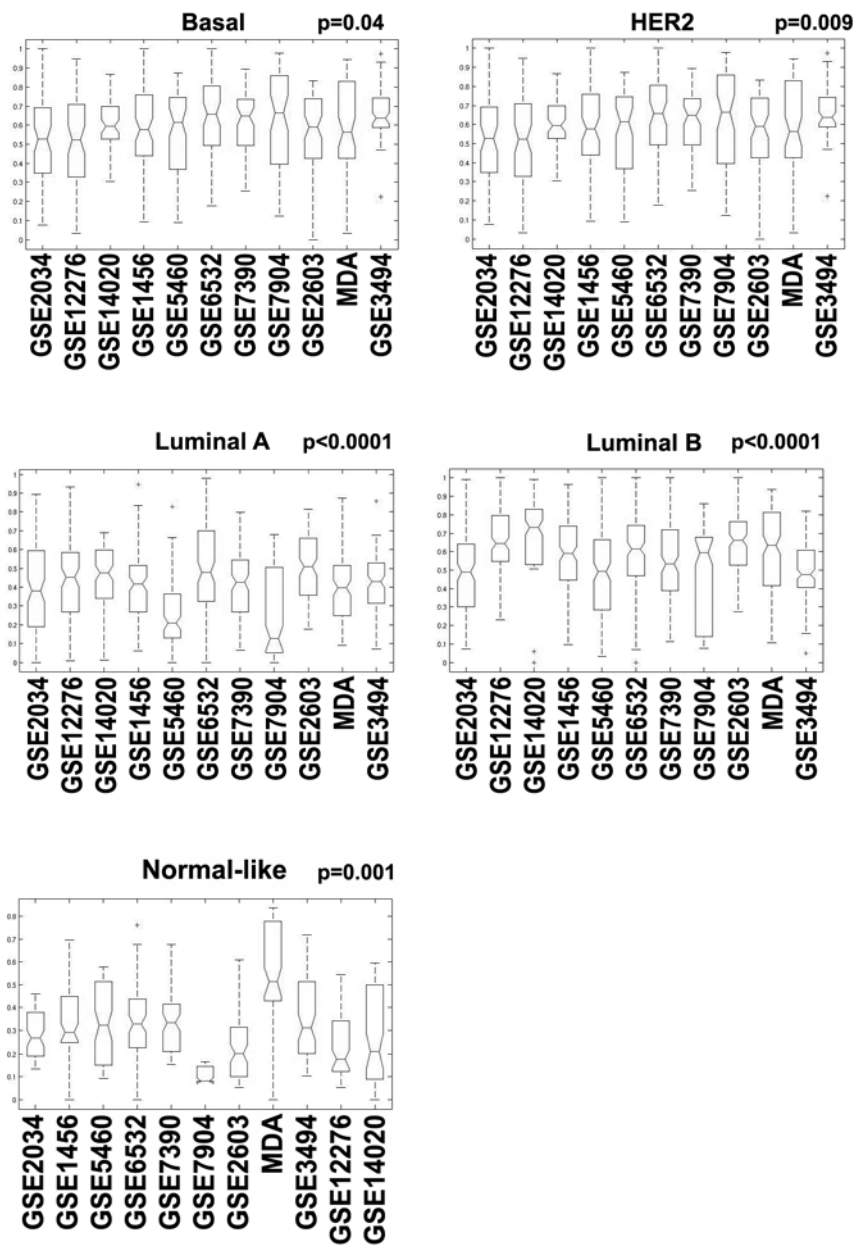

**Supplemental Figure 1. Box and whisker analysis of datasets,** Each graph represents one of the five subtypes of breast cancer. The x-axis gives the eleven datasets used in the meta-analysis. The y-axis is the predicted sensitivity to VPA. The horizontal line indicates the median for each dataset. The box ranges from the 25<sup>th</sup> to the 75<sup>th</sup> percentile. The whiskers show the maximum and minimum value for each dataset, excluding outliers, which are indicated by plus signs. P-values from ANOVA are given below the graphs.

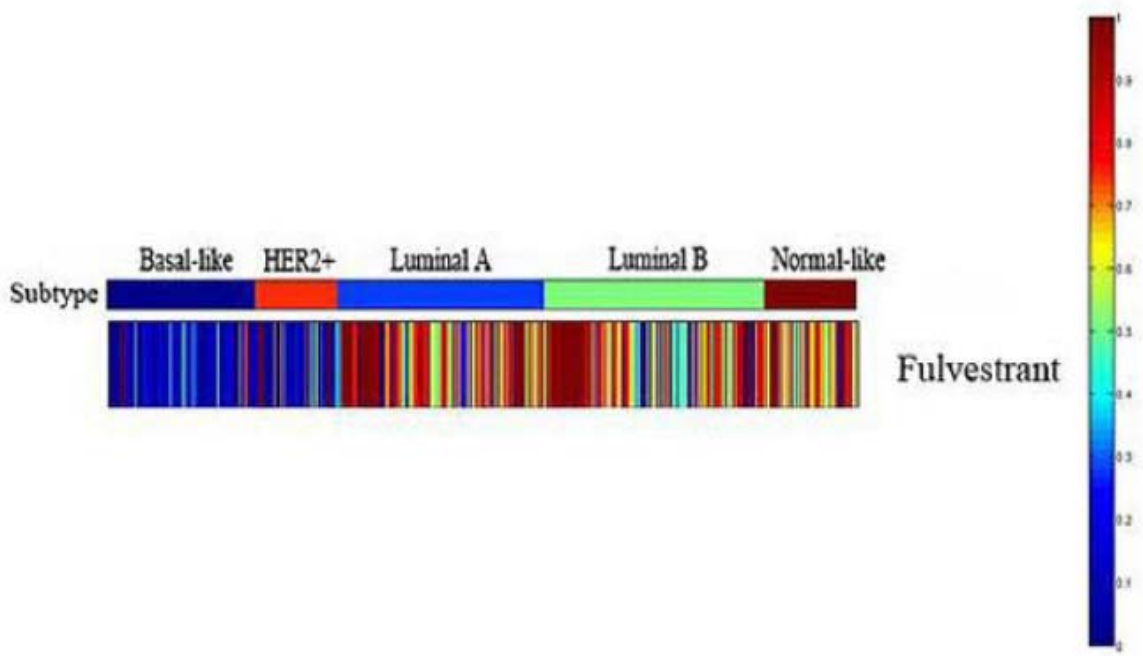

**Supplemental Figure 2. Predicted response to fulvestrant across breast cancer subtypes.**

Heatmap of predicted sensitivity to fulvestrant, an estrogen antagonist. Each vertical line is a sample. Red indicates more sensitive and blue indicates less sensitive.

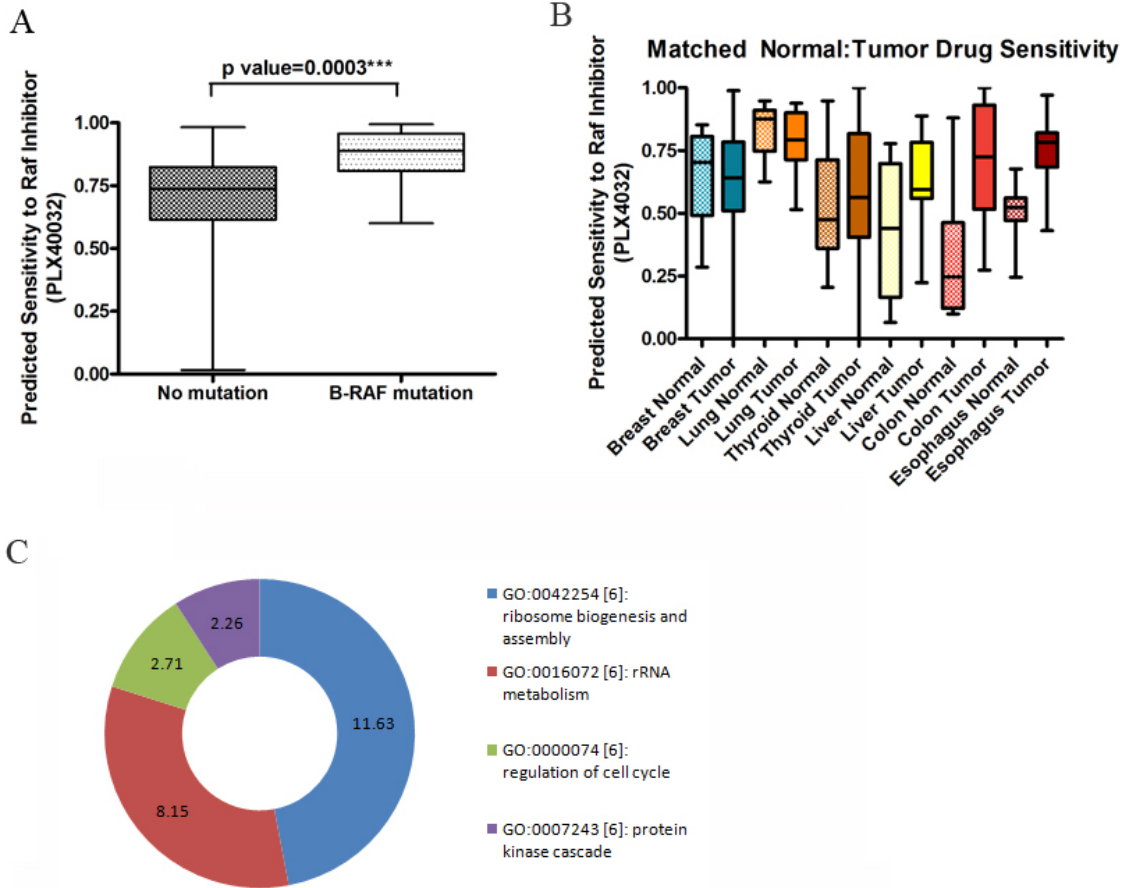

**Supplemental Figure 3. PLX4032 Signature and Validation.** (A) Box-whisker plot of predicted PLX4032 sensitivity across the GSK cell lines stratified by the presence of a B-RAF mutation as listed in the Sanger database. (B) Box-whisker plot for PLX4032 sensitivity across cancer types in GSE5364. Boxes for normal adjacent tissue are checked. Median is indicated by a horizontal line. The box gives the interquartile range, and the error bars indicate the total range. (C) Doughnut plot of the level 6 Gene Ontology terms for the genes in the PLX4032 signature with Bayes factor greater than 2. Bayes factor for each term is given on the doughnut

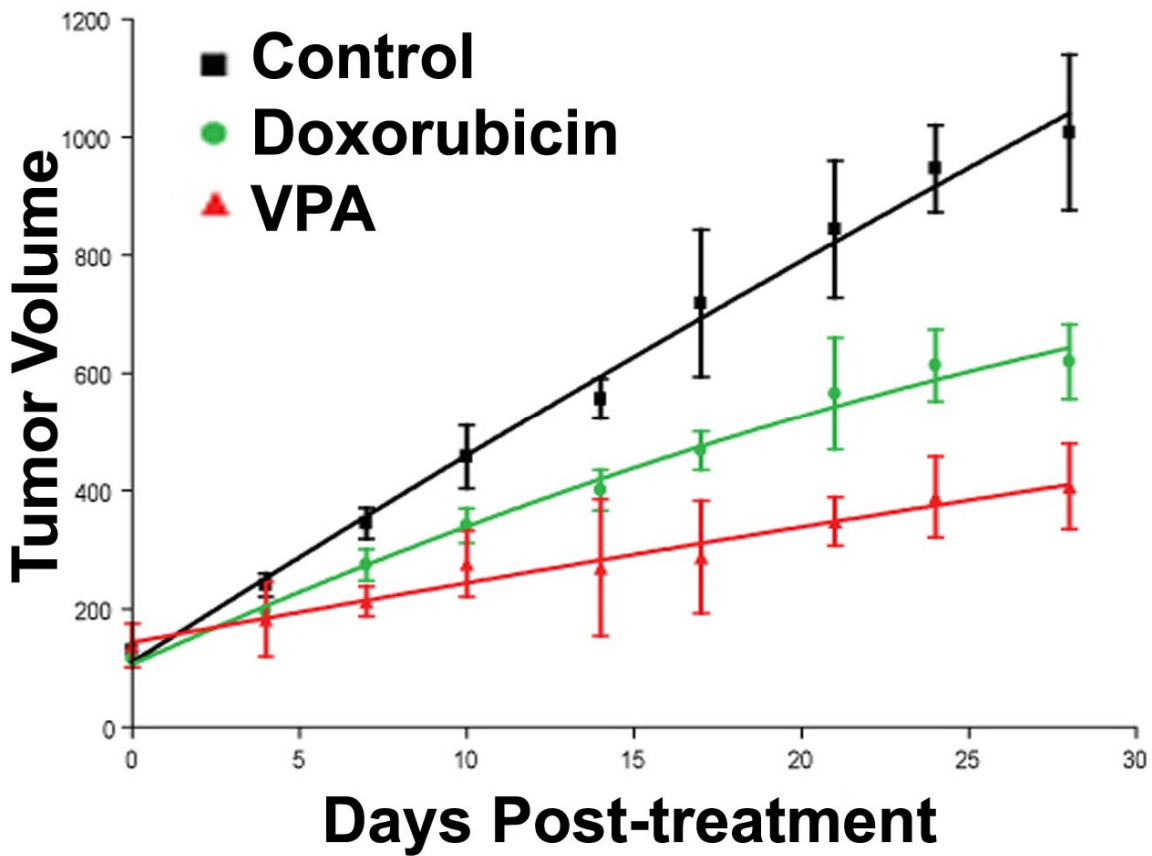

**Supplemental Figure 4.** In vivo response to VPA and doxorubicin in a VPA-sensitive xenograft. Ten mice are in each sample.

| GEO GSE      | Basal-like | Her2+      | Luminal A  | Luminal B  | Normal-like | Total       |
|--------------|------------|------------|------------|------------|-------------|-------------|
| GSE2034      | 66         | 36         | 86         | 85         | 13          | 286         |
| GSE2603      | 30         | 13         | 22         | 25         | 9           | 99          |
| GSE3494      | 16         | 16         | 38         | 27         | 23          | 120         |
| GSE1456      | 28         | 12         | 41         | 49         | 29          | 159         |
| GSE5460      | 38         | 20         | 39         | 27         | 3           | 127         |
| GSE6532      | 45         | 35         | 111        | 148        | 73          | 412         |
| GSE7390      | 42         | 14         | 41         | 49         | 12          | 158         |
| MDA          | 28         | 24         | 31         | 30         | 13          | 126         |
| GSE7904      | 20         | 8          | 8          | 11         | 3           | 50          |
| GSE12276     | 60         | 35         | 50         | 49         | 10          | 204         |
| GSE14020     | 19         | 12         | 13         | 12         | 6           | 62          |
| <b>Total</b> | <b>392</b> | <b>225</b> | <b>480</b> | <b>512</b> | <b>194</b>  | <b>1803</b> |

**Supplemental Table 1.** Subtype breakdown for the eleven independent breast cancer datasets.

Duplicate samples from overlapping datasets have been removed.
